# Supplementary material for: Temporal lobe connects regression and macrocephaly to autism spectrum disorders
Source: Springer Nature journal article supplement (doi:10.1007/s00787-015-0746-9), 2015-07-29
Supplement: MOESM1 [file 8685416]

**Temporal Lobe connects Regression and Macrocephaly to Autism Spectrum Disorders**

Giulia Valvo<sup>1</sup>, Sara Baldini<sup>1</sup>, Alessandra Retico<sup>2</sup>, Giuseppe Rossi<sup>3</sup>, Raffaella Tancredi<sup>1</sup>, Anna Rita Ferrari<sup>1</sup>, Sara Calderoni<sup>1</sup>, Fabio Apicella<sup>1</sup>, Filippo Muratori<sup>1</sup>, Filippo Maria Santorelli<sup>1</sup>, and Federico Sicca<sup>1</sup>

<sup>1</sup> Department of Developmental Neuroscience, IRCCS Stella Maris Foundation, Pisa, Italy

<sup>2</sup> National Institute for Nuclear Physics, Pisa Division, Italy

<sup>3</sup> Unit of Epidemiology and Biostatistics, Institute of Clinical Physiology, National Research Council (CNR), Pisa, Italy

**Corresponding Author**

Dr. Federico Sicca, Clinical Neurophysiology Laboratory - Department of Developmental Neuroscience

IRCCS Stella Maris Foundation - Via dei Giacinti, 2, Calambrone - 56128 Pisa – Italy,

Email: federico.sicca@fsm.unipi.it - Phone Number +39050886234, Fax Number +39050886247.

**Table S1** Type of interictal EEG abnormalities according to their site

|                         | <b>Anterior</b> | <b>Posterior</b> | <b>Temporal</b> | <b>Multifocal/Diffuse</b> | <b>Effect size</b> | <b>Test</b>     |
|-------------------------|-----------------|------------------|-----------------|---------------------------|--------------------|-----------------|
|                         | <b>n: 53</b>    | <b>n:21</b>      | <b>n:21</b>     | <b>n:59</b>               |                    |                 |
| <b>EEG Type (n) ***</b> |                 |                  |                 |                           |                    |                 |
| Paroxysms (81)          | 42 (79,2%)      | 10 (47,6%)       | 2 (9,5%)        | 27 (45,8%)                | $\phi_c=0.659$     | $\chi^2=66.964$ |
| Focal slowing (22)      | 3 (5,7%)        | 6 (28,6%)        | 12 (57,1%)      | 1 (1,7%)                  |                    |                 |
| Both (51)               | 8 (15,1%)       | 5 (23,8%)        | 7 (33,3%)       | 31 (52,5%)                |                    |                 |

n= number of patients,  $\chi^2$ = Pearson chi-squared test;  $\phi_c$ = Cramer's phi coefficient; \*\*\*  $p \leq 0.001$ . Focal paroxysms were prevalent on anterior areas, focal slowing on temporal regions, and both types of EEG abnormalities in multifocal/diffuse localization (\*\*\*)

**Table S2** Correspondence Analysis of Site of interictal EEG abnormalities vs. Type of EEG abnormalities

| Summary   |         |            |       |                       |            |                           |             |
|-----------|---------|------------|-------|-----------------------|------------|---------------------------|-------------|
| Dimension | Inertia | Chi Square | Sig.  | Proportion of Inertia |            | Confidence Singular Value |             |
|           |         |            |       | Accounted for         | Cumulative | Standard Deviation        | Correlation |
| 1         | 0.314   |            |       | 0.722                 | 0.722      | 0.078                     | -0.008      |
| 2         | 0.121   |            |       | 0.278                 | 1.000      | 0.074                     |             |
| Total     | 0.435   | 66.964     | 0.000 | 1.000                 | 1.000      |                           |             |

| Overview Row Points    |                    |        |         |                                  |       |                                  |       |       |
|------------------------|--------------------|--------|---------|----------------------------------|-------|----------------------------------|-------|-------|
| Site                   | Score in Dimension |        |         | Contribution                     |       |                                  |       |       |
|                        | 1                  | 2      | Inertia | Of Point to Inertia of Dimension |       | Of Dimension to Inertia of Point |       |       |
|                        |                    |        |         | 1                                | 2     | 1                                | 2     | Total |
| Anterior               | -0.498             | 0.649  | 0.098   | 0.152                            | 0.416 | 0.486                            | 0.514 | 1.000 |
| Posterior              | 0.490              | 0.336  | 0.024   | 0.058                            | 0.044 | 0.774                            | 0.226 | 1.000 |
| Temporal               | 1.710              | -0.006 | 0.223   | 0.712                            | 0.000 | 1.000                            | 0.000 | 1.000 |
| Multifocal/<br>Diffuse | -0.336             | -0.700 | 0.090   | 0.077                            | 0.540 | 0.271                            | 0.729 | 1.000 |
| Active                 |                    |        | 0.435   | 1.000                            | 1.000 |                                  |       |       |
| Total                  |                    |        |         |                                  |       |                                  |       |       |

| Overview Column Points |                    |        |         |                                  |       |                                  |       |       |
|------------------------|--------------------|--------|---------|----------------------------------|-------|----------------------------------|-------|-------|
| Type                   | Score in Dimension |        |         | Contribution                     |       |                                  |       |       |
|                        | 1                  | 2      | Inertia | Of Point to Inertia of Dimension |       | Of Dimension to Inertia of Point |       |       |
|                        |                    |        |         | 1                                | 2     | 1                                | 2     | Total |
| Paroxysms              | -0.477             | 0.415  | 0.099   | 0.214                            | 0.260 | 0.681                            | 0.319 | 1.000 |
| Focal slowing          | 1.756              | 0.416  | 0.255   | 0.786                            | 0.071 | 0.966                            | 0.034 | 1.000 |
| Both                   | 0.001              | -0.838 | 0.081   | 0.000                            | 0.669 | 0.000                            | 1.000 | 1.000 |
| Active Total           |                    |        | 0.435   | 1.000                            | 1.000 |                                  |       |       |

CA (two dimensions): **1° Dimension** (72% of total inertia): **in row (Site of EEG abnormalities)**, Temporal has the higher contribution to inertia (71%, positive sign), followed by Anterior (15%, negative sign); **in column (Type of EEG abnormalities)**, Focal slowing has the higher contribution to inertia (79%, positive sign), followed by Paroxysms (21%, negative sign). **2° Dimension** (28% of total inertia): **in row (Site of EEG abnormalities)**, Multifocal/Diffuse has the higher contribution to inertia (54%, negative sign), followed by Anterior (41%, positive sign); **in column (Type of EEG abnormalities)**, Both has the higher contribution to inertia (67%, negative sign), followed by Paroxysms (26%, positive sign)

**Table S3** Site and Type of interictal EEG abnormalities according to presence or absence of seizures

|                    | Seizures   | No seizures | Effect size    | Test            |
|--------------------|------------|-------------|----------------|-----------------|
| <b>Site</b>        |            |             |                |                 |
| Anterior           | 17 (29.3%) | 36 (37.5%)  | $\phi_c=0.103$ | $\chi^2=1.637$  |
| Posterior          | 10 (17.2%) | 11 (11.5%)  |                |                 |
| Temporal           | 8 (13.8%)  | 13 (13.5%)  |                |                 |
| Multifocal/Diffuse | 23 (39.7%) | 36 (37.5%)  |                |                 |
| <b>Type **</b>     |            |             |                |                 |
| Paroxysms          | 22 (37.9%) | 59 (61.5%)  | $\phi_c=0.281$ | $\chi^2=12.133$ |
| Focal slowing      | 7 (12.1%)  | 15 (15.6%)  |                |                 |
| Both               | 29 (50%)   | 22 (22.9%)  |                |                 |

$\chi^2$  = Pearson chi-squared test;  $\phi_c$  = Cramer's phi coefficient; \*\*  $p \leq 0.01$ .

Patients with seizures displayed a significant association with the concurrence of both types of EEG abnormalities (paroxysms and focal slowing)

**Table S4** Analysis of clinical variables in individuals with interictal EEG abnormalities, according to presence or absence of seizures

|                              | <b>Seizures</b>   | <b>No seizures</b> | <b>Effect size</b> | <b>Test</b>           |
|------------------------------|-------------------|--------------------|--------------------|-----------------------|
| <b>Age (mean±SD; range)</b>  | 9.2±5.0; 2.2-20.8 | 6.9±3.2; 2.0-17.5  | -                  | t=3.185               |
| <b>Gender</b>                |                   |                    |                    |                       |
| Male                         | 49 (84.5%)        | 77 (80.2%)         | φc=0.054           | χ <sup>2</sup> =0.444 |
| Female                       | 9 (15.5%)         | 19 (19.8%)         |                    |                       |
| <b>ASD diagnosis</b>         |                   |                    |                    |                       |
| Autism                       | 20 (34.5%)        | 29 (30.2%)         | φc=0.192           | χ <sup>2</sup> =5.660 |
| PDDNOS                       | 35 (60.3%)        | 67 (69.8%)         |                    |                       |
| Asperger                     | 3 (5.2%)          | 0                  |                    |                       |
| <b>Language Development</b>  |                   |                    |                    |                       |
| Normal                       | 14 (24.1%)        | 19 (19.8%)         | φc=0.143           | χ <sup>2</sup> =3.133 |
| Delayed                      | 23 (39.7%)        | 52 (54.2%)         |                    |                       |
| Absent                       | 21 (36.2%)        | 25 (26%)           |                    |                       |
| <b>Cognitive Development</b> |                   |                    |                    |                       |
| Normal-Borderline            | 18 (34%)          | 37 (40.2%)         | φc=0.109           | χ <sup>2</sup> =1.709 |
| Mild-Moderate Delay          | 19 (35.8%)        | 36 (39.1%)         |                    |                       |
| Severe Delay                 | 16 (30.2%)        | 19 (20.7%)         |                    |                       |
| <b>Regression</b>            |                   |                    |                    |                       |
| Yes                          | 26 (47.3%)        | 39 (41.1%)         | φc=0.06            | χ <sup>2</sup> =0.549 |
| No                           | 29 (52.7%)        | 56 (58.9%)         |                    |                       |
| <b>Macrocephaly</b>          |                   |                    |                    |                       |
| Yes                          | 20 (36.4%)        | 24 (25.8%)         | φc=0.112           | χ <sup>2</sup> =1.844 |
| No                           | 35 (63.6%)        | 69 (74.2%)         |                    |                       |
| <b>Tall stature</b>          |                   |                    |                    |                       |
| Yes                          | 6 (10.9%)         | 12 (13.3%)         | φc=0.036           | χ <sup>2</sup> =0.185 |
| No                           | 49 (89.1%)        | 78 (86.7%)         |                    |                       |
| <b>Behavioral problems</b>   |                   |                    |                    |                       |
| Yes                          | 30 (54.5%)        | 51 (53.7%)         | φc=0.008           | χ <sup>2</sup> =0.010 |
| No                           | 25 (45.5%)        | 44 (46.3%)         |                    |                       |

t=t-test; χ<sup>2</sup>= Pearson chi-squared test; φc= Cramer's phi coefficient ; \*\* p≤0.01 Mean age was

higher in individuals with seizures

**Table S5** Analysis of clinical variables in individuals with interictal EEG abnormalities (excluding those with only focal slowing), according to presence or absence of seizures

|                              | <b>Seizures</b>   | <b>No seizures</b> | <b>Effect size</b> | <b>Test</b>           |
|------------------------------|-------------------|--------------------|--------------------|-----------------------|
| <b>Age (mean±SD; range)</b>  | 8.9±4.7; 2.2-19.4 | 6.7±3.3; 2.0-17.5  | -                  | t=2.860               |
| <b>Gender</b>                |                   |                    |                    |                       |
| Male                         | 43 (84.3%)        | 64 (79%)           | φc=0.066           | χ <sup>2</sup> =0.573 |
| Female                       | 8 (15.7%)         | 17 (21%)           |                    |                       |
| <b>ASD diagnosis</b>         |                   |                    |                    |                       |
| Autism                       | 17 (33.3%)        | 23 (28.4%)         | φc=0.205           | χ <sup>2</sup> =5.560 |
| PDDNOS                       | 31 (60.8%)        | 58 (71.6%)         |                    |                       |
| Asperger                     | 3 (5.9%)          | 0                  |                    |                       |
| <b>Language Development</b>  |                   |                    |                    |                       |
| Normal                       | 13 (25.5%)        | 17 (21%)           | φc=0.104           | χ <sup>2</sup> =1.430 |
| Delayed                      | 21 (41.2%)        | 42 (51.9%)         |                    |                       |
| Absent                       | 17 (33.3%)        | 22 (27.1%)         |                    |                       |
| <b>Cognitive Development</b> |                   |                    |                    |                       |
| Normal-Borderline            | 17 (37%)          | 33 (42.3%)         | φc=0.090           | χ <sup>2</sup> =0.994 |
| Mild-Moderate Delay          | 16 (34.8%)        | 29 (37.2%)         |                    |                       |
| Severe Delay                 | 13 (28.2%)        | 16 (20.5%)         |                    |                       |
| <b>Regression</b>            |                   |                    |                    |                       |
| Yes                          | 22 (45.8%)        | 31 (38.8%)         | φc=0.070           | χ <sup>2</sup> =0.620 |
| No                           | 26 (54.2%)        | 49 (61.2%)         |                    |                       |
| <b>Macrocephaly</b>          |                   |                    |                    |                       |
| Yes                          | 16 (32.7%)        | 19 (24.4%)         | φc=0.090           | χ <sup>2</sup> =1.037 |
| No                           | 33 (67.3%)        | 59 (75.6%)         |                    |                       |
| <b>Tall stature</b>          |                   |                    |                    |                       |
| Yes                          | 6 (12.2%)         | 9 (12%)            | φc=0.004           | χ <sup>2</sup> =0.002 |
| No                           | 43 (87.8%)        | 66 (88%)           |                    |                       |
| <b>Behavioral problems</b>   |                   |                    |                    |                       |
| Yes                          | 26 (54.2%)        | 43 (53.8%)         | φc=0.004           | χ <sup>2</sup> =0.002 |
| No                           | 22 (45.8%)        | 37 (46.2%)         |                    |                       |

t=t-test; χ<sup>2</sup>= Pearson chi-squared test; φc= Cramer's phi coefficient ; \*\* p≤0.01 Mean age was

higher in individuals with seizures

**Table S6** Presence of interictal EEG abnormalities is related to regressive onset of ASD

| <b>Onset vs EEG groups *</b> | <b>Regressive<br/>(n=82)</b> | <b>Non-Regressive<br/>(n=132)</b> | <b>Effect size</b> | <b>Test</b>    |
|------------------------------|------------------------------|-----------------------------------|--------------------|----------------|
| ASD-EEG                      | 65 (79.3%)                   | 85 (64.4%)                        | $\phi_c=0.158$     | $\chi^2=5.338$ |
| ASD “simplex”                | 17 (20.7%)                   | 47 (35.6%)                        |                    |                |

$\chi^2$  = Pearson chi-squared test;  $\phi_c$  = Cramer’s phi coefficient; \*  $p \leq 0.05$ .

Regressive onset of ASD was significantly associated to the ASD-EEG group (\*)

**Table S7** Volumetric analysis at the ROI level

| ROI                         | Regression | Macrocephaly | Descriptive |                | GLM Univariate Analysis |       |                     |
|-----------------------------|------------|--------------|-------------|----------------|-------------------------|-------|---------------------|
|                             |            |              | Mean        | Std. Deviation | F                       | p     | Partial Eta Squared |
| <b>Left hemisphere</b>      | No         | No           | 0.40298733  | 0.004632004    | 0.001                   | 0.974 | 0.000               |
|                             |            | Yes          | 0.40917733  | 0.006943139    |                         |       |                     |
|                             | Yes        | No           | 0.39993600  | 0.020363261    |                         |       |                     |
|                             |            | Yes          | 0.40649533  | 0.002804229    |                         |       |                     |
| <b>Right hemisphere</b>     | No         | No           | 0.40615733  | 0.003131560    | 0.025                   | 0.878 | 0.004               |
|                             |            | Yes          | 0.40544000  | 0.002320436    |                         |       |                     |
|                             | Yes        | No           | 0.40304050  | 0.011253604    |                         |       |                     |
|                             |            | Yes          | 0.40115867  | 0.006762369    |                         |       |                     |
| <b>Left Frontal Lobe</b>    | No         | No           | 0.14557633  | 0.002787111    | 0.951                   | 0.362 | 0.120               |
|                             |            | Yes          | 0.14719867  | 0.002258127    |                         |       |                     |
|                             | Yes        | No           | 0.13924050  | 0.000304763    |                         |       |                     |
|                             |            | Yes          | 0.14755133  | 0.009840529    |                         |       |                     |
| <b>Right Frontal Lobe</b>   | No         | No           | 0.14637867  | 0.000658002    | 3.104                   | 0.121 | 0.307               |
|                             |            | Yes          | 0.14503067  | 0.002396949    |                         |       |                     |
|                             | Yes        | No           | 0.13635250  | 0.002317189    |                         |       |                     |
|                             |            | Yes          | 0.14436633  | 0.007550620    |                         |       |                     |
| <b>Left Parietal Lobe</b>   | No         | No           | 0.08288400  | 0.001098603    | 0.019                   | 0.895 | 0.003               |
|                             |            | Yes          | 0.08629833  | 0.003321065    |                         |       |                     |
|                             | Yes        | No           | 0.08332900  | 0.016085265    |                         |       |                     |
|                             |            | Yes          | 0.08561967  | 0.003823161    |                         |       |                     |
| <b>Right Parietal Lobe</b>  | No         | No           | 0.08176333  | 0.001452419    | 0.146                   | 0.714 | 0.020               |
|                             |            | Yes          | 0.08411700  | 0.004379908    |                         |       |                     |
|                             | Yes        | No           | 0.08453450  | 0.011609986    |                         |       |                     |
|                             |            | Yes          | 0.08441100  | 0.003113454    |                         |       |                     |
| <b>Left Limbic Lobe</b>     | No         | No           | 0.02302067  | 0.000375758    | 1.499                   | 0.260 | 0.176               |
|                             |            | Yes          | 0.02499633  | 0.002440135    |                         |       |                     |
|                             | Yes        | No           | 0.02335750  | 0.000753069    |                         |       |                     |
|                             |            | Yes          | 0.02311200  | ,001140100     |                         |       |                     |
| <b>Right Limbic Lobe</b>    | No         | No           | 0.02199933  | 0.000826109    | 1.193                   | 0.311 | 0.146               |
|                             |            | Yes          | 0.02400867  | 0.002270815    |                         |       |                     |
|                             | Yes        | No           | 0.02222500  | 0.000151321    |                         |       |                     |
|                             |            | Yes          | 0.02234967  | 0.001047550    |                         |       |                     |
| <b>Left Occipital Lobe</b>  | No         | No           | 0.04144700  | 0.003523421    | 0.093                   | 0.769 | 0.013               |
|                             |            | Yes          | 0.03904033  | 0.001648448    |                         |       |                     |
|                             | Yes        | No           | 0.04523750  | 0.004851460    |                         |       |                     |
|                             |            | Yes          | 0.04168467  | 0.002468380    |                         |       |                     |
| <b>Right Occipital Lobe</b> | No         | No           | 0.04493033  | 0.002047379    | 0.099                   | 0.762 | 0.014               |
|                             |            | Yes          | 0.04163200  | 0.001645102    |                         |       |                     |
|                             | Yes        | No           | 0.04684700  | 0.001374616    |                         |       |                     |
|                             |            | Yes          | 0.04423467  | 0.001808869    |                         |       |                     |



|                              |     |       |            |             |       |              |       |
|------------------------------|-----|-------|------------|-------------|-------|--------------|-------|
| <b>Left Temporal Lobe</b>    | No  | No    | 0.11005900 | 0.003985245 | 0.271 | 0.618        | 0.037 |
|                              |     | Yes   | 0.11164467 | 0.001657740 |       |              |       |
|                              | Yes | No    | 0.10877150 | 0.001631295 |       |              |       |
|                              |     | Yes   | 0.10852733 | 0.002971575 |       |              |       |
| <b>Right Temporal Lobe *</b> | No  | No    | 0.11108600 | 0.002320124 | 8.029 | <b>0.025</b> | 0.534 |
|                              |     | Yes   | 0.11065233 | 0.001050177 |       |              |       |
|                              | Yes | No    | 0.11308200 | 0.000738219 |       |              |       |
|                              |     | Yes * | 0.10579700 | 0.002623600 |       |              |       |
| <b>Left Insula</b>           | No  | No    | 0.01210700 | 0.000565833 | 0.413 | 0.541        | 0.056 |
|                              |     | Yes   | 0.01258767 | 0.000773793 |       |              |       |
|                              | Yes | No    | 0.01233550 | 0.000482954 |       |              |       |
|                              |     | Yes   | 0.01233867 | 0.000503794 |       |              |       |
| <b>Right Insula</b>          | No  | No    | 0.01128333 | 0.000730871 | 1.858 | 0.215        | 0.210 |
|                              |     | Yes   | 0.01209967 | 0.000952960 |       |              |       |
|                              | Yes | No    | 0.01153050 | 0.000020506 |       |              |       |
|                              |     | Yes   | 0.01118700 | 0.000496617 |       |              |       |
| <b>Left Caudato</b>          | No  | No    | 0.00514067 | 0.000112647 | 0.194 | 0.673        | 0.027 |
|                              |     | Yes   | 0.00530433 | 0.000145225 |       |              |       |
|                              | Yes | No    | 0.00516650 | 0.000325976 |       |              |       |
|                              |     | Yes   | 0.00551733 | 0.000578122 |       |              |       |
| <b>Right Caudato</b>         | No  | No    | 0.00494567 | 0.000111267 | 0.030 | 0.867        | 0.004 |
|                              |     | Yes   | 0.00505733 | 0.000154649 |       |              |       |
|                              | Yes | No    | 0.00515500 | 0.000455377 |       |              |       |
|                              |     | Yes   | 0.00534800 | 0.000611532 |       |              |       |
| <b>Left Putamen</b>          | No  | No    | 0.00514000 | 0.000735268 | 4.972 | 0.061        | 0.415 |
|                              |     | Yes   | 0.00569033 | 0.000067885 |       |              |       |
|                              | Yes | No    | 0.00622200 | 0.000441235 |       |              |       |
|                              |     | Yes   | 0.00543000 | 0.000450551 |       |              |       |
| <b>Right Putamen</b>         | No  | No    | 0.00514667 | 0.000793739 | 3.413 | 0.107        | 0.328 |
|                              |     | Yes   | 0.00571267 | 0.000275558 |       |              |       |
|                              | Yes | No    | 0.00606600 | 0.000384666 |       |              |       |
|                              |     | Yes   | 0.00547833 | 0.000360673 |       |              |       |
| <b>Cerebellum</b>            | No  | No    | 0.13790900 | 0.006639766 | 0.061 | 0.812        | 0.009 |
|                              |     | Yes   | 0.13004900 | 0.008946755 |       |              |       |
|                              | Yes | No    | 0.14081700 | 0.032949762 |       |              |       |
|                              |     | Yes   | 0.13752367 | 0.011448932 |       |              |       |
| <b>Brainstem</b>             | No  | No    | 0.00918300 | 0.000294250 | 0.023 | 0.883        | 0.003 |
|                              |     | Yes   | 0.00888300 | 0.000626266 |       |              |       |
|                              | Yes | No    | 0.00973150 | 0.000734684 |       |              |       |
|                              |     | Yes   | 0.00952300 | 0.000296565 |       |              |       |

ROI= region of interest. Descriptive: mean and SD of the volume ratios (ROI cortex /total gray matter). GLM

Univariate Analysis: F=two-way ANOVA; p= significance; Partial Eta Squared=effect size; \* p≤ 0.05 (significant reduction of the volume ratio at the right temporal lobe in patients with both macrocephaly and regression)
